# Supplementary material for: Overexpression of m6A-factors METTL3, ALKBH5, and YTHDC1 alters HPV16 mRNA splicing
Source: PubMed Central journal article supplement (PMC8948141; doi:10.1007/s11262-022-01889-6), 2022-02-21
Supplement: 11262_2022_1889_MOESM1_ESM.pdf [file 11262_2022_1889_MOESM1_ESM.pdf]

## SUPPLEMENTARY FIGURE LEGENDS

**Supplementary Figure S1** Sequence of in vitro synthesized, m6A-containing RNA.

**Supplementary Figure S2 (A)** Left panel: Western blot with anti-Flag antibody on proteins harvested from HeLa cells transfected with empty pUC plasmid (-), pYTHDC1, pMETTL3, pMETTL14, pWTAP or pFTO. Middle panel: Western blot with anti-ALKBH5 antibody on proteins harvested from HeLa cells transfected with empty pUC plasmid (-) or pALKBH5. Right panel: Long exposure of Western blot with anti-Flag antibody on proteins harvested from HeLa cells transfected in duplicates with empty pUC plasmid (-), pMETTL3, pMETTL14 or pWTAP. **(B)** Effect of METTL3, METTL14, WTAP or all three combined on HPV16 E6/E7 mRNA splicing was monitored by RT-PCR with indicated primer pair on RNA extracted from HeLa cells transfected with pC97ELsLuc and empty pUC plasmid (-), pMETTL3, pMETTL14, pWTAP or pMETTL3, pMETTL14 and pWTAP combined. **(C)** Effect of METTL3, METTL14, WTAP or all three combined on HPV16 E2 mRNA splicing was monitored by RT-PCR with indicated primer pair on RNA extracted from HeLa cells transfected with pC97ELsLuc and empty pUC plasmid (-), pMETTL3, pMETTL14, pWTAP or pMETTL3, pMETTL14 and pWTAP combined. **(D)** Effect of FTO and ALKBH5 overexpression on HPV16 L1- and E4- mRNA splicing was monitored by RT-PCR with indicated primer pairs on RNA extracted from pBELsLuc with empty pUC plasmid (-), pFTO or pALKBH5.

**Supplementary Figure S3 (A)** m6A site prediction on the HPV16 genome performed using the online software SRAMP (<http://www.cuilab.cn/sramp/>) (Zhou). Selected HPV16 splice sites SD226, SA409, SD880, SA2709, SA3358 and SD3632 are indicated. Numbers refer to the HPV16 reference strain (GeneBank: K02718.1). HPV16 early and late polyadenylation signals pAE and pAL, respectively, are indicated. **(B)** A subset of alternatively spliced HPV16 mRNAs are depicted.

**Supplementary Figure S1.** *In Vitro* transcribed cloning vector RNA sequence.

AGGATTTTCGAGCGTGGGTCACTGAGCTCAGTGGACGAAAACCTCACGTTAAGGGATTTT  
GGTCATGAGATTATCAAAAAGGATCTTCACCTAGATCCTTTTTAAATTA AAAAATGAAGTTTT  
AAATCAATCTAAAGTATATATGAGTAACTTGGTCTGACAGTTACCAATGCTTAATCAGT  
GAGGCACCTATCTCAGCGATCTGTCTATTTGTTTCATCCATAGTTGCCTGACTCCCCGT  
CGTGTAGATAACTACGATACGGGAGGGCTTACCATCTGGCCCCAGTGCTGCAATGATA  
CCGCGAGACCCACGCTCACCGGCTCCAGATTTATCAGCAATAAACCAGCCAGCCGGAA  
GGGCCGAGCGCAGAAGTGGTCCTGCAACTTTATCCGCCTCCATCCAGTCTATTAATTGT  
TGCCGGGAAGCTAGAGTAAGTAGTTCGCCAGTTAATAGTTTGCGCAACGTTGTTGCCAT  
TGCTACAGGCATCGTGGTGTACGCTCGTCGTTTGGTATGGCTTCATTCAGCTCCGGTT  
CCCAACGATCAAGGCGAGTTACATGATCCCCCATGTTGTGCAAAAAGCGGTTAGCTCT  
TTCGGTCCTCCGATCGTTGTCAGAAGTAAGTTGGCCGCAGTGTTATCACTCATGGTTAT  
GGCAGCACTGCATAATTCTCTTACTGTCATGCCATCCGTAAGATGCTTTTTCTGTGACTG  
GTGAGTACTCAACCAAGTCATTCTGAGAATAGTGTATGCGGCGACCGAGTTGCTCTTGC  
CCGGCGTCAATACGGGATAATACCGCGCCACATAGCAGA ACTTTAAAAGTGCTCATCAT  
TGAAAACGTTCTTCGGGACGAAAACCTCTCAAGGATCTTACCGCTGTTGAGATCCAGTT  
CGATGTAACCCACTCGTGCACCCAACTGATCTTCAGCATCTTTTACTTTTACCAGCGTTT  
CTGGGGTGAGCAAAAACAGGAAGGCAAAATGCCGCAAAAAGGGAATAAGGGGCGACA  
CGGAAATGTTGAATACTCATACTCTTCCTTTTTCAATATTATTGAAGCATTATCAGGGTT  
ATTGTCTCATGAGCGGATACATATTTGAATGTATTTAGAAAAATAACAAATAGGGGTTCC  
GCCGCAATTTTCCCCAAAATGCCACCTGAACTTCAAGAAAC

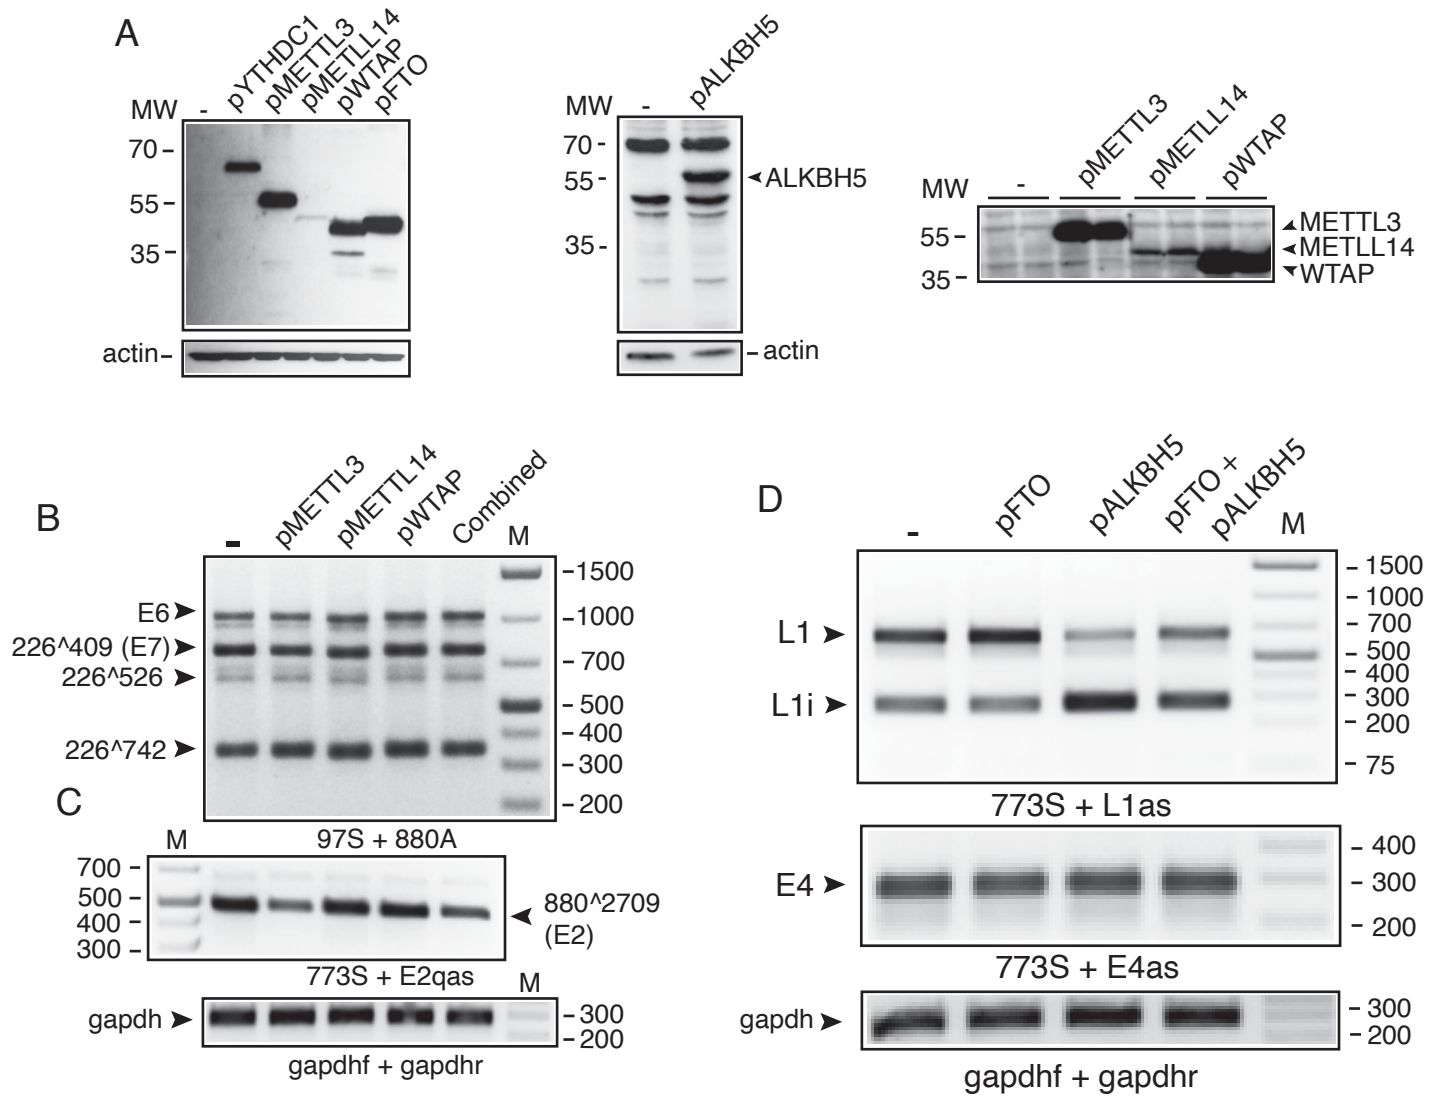

A  
m6A predictions in the HPV16 genome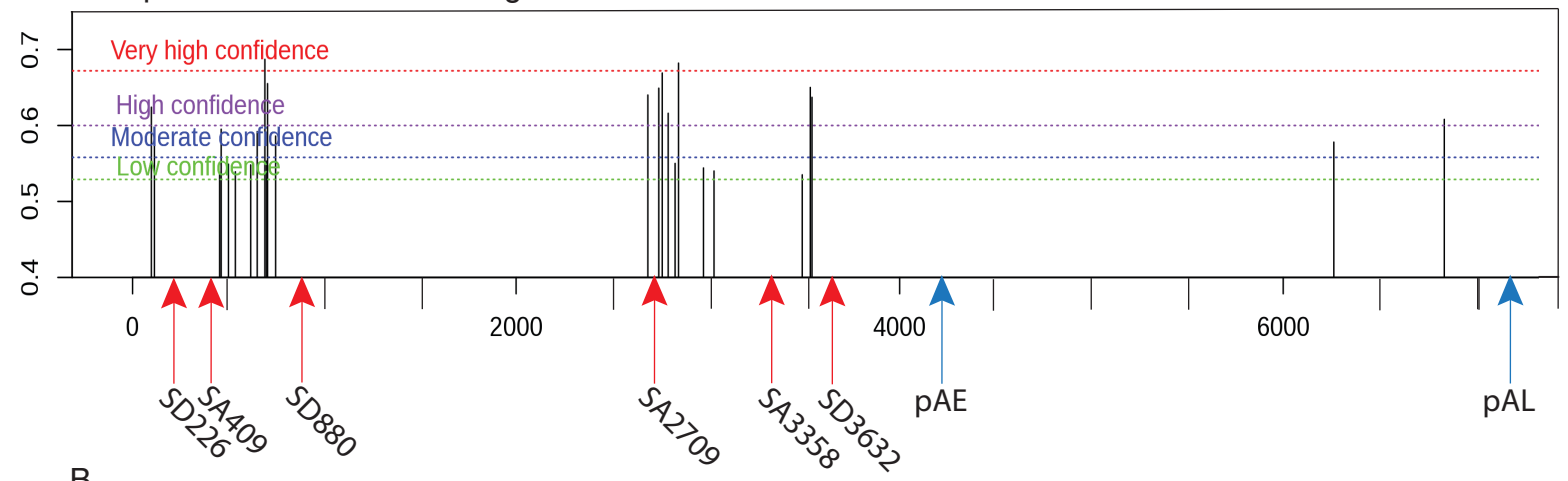

## B

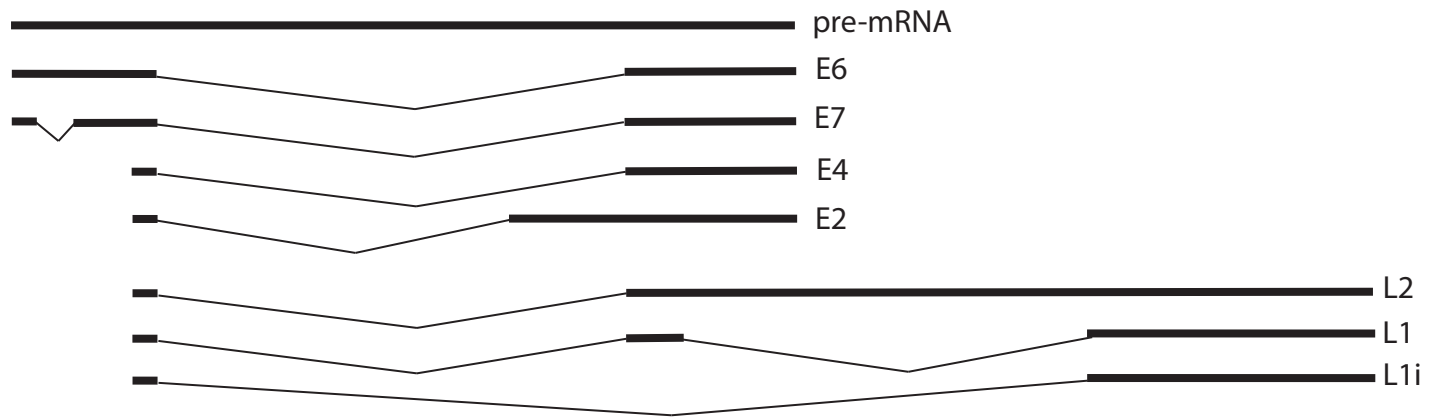

**Supplementary Table 1.** Primer list.

| <b>RT-PCR primer name</b> | <b>Amplified sequences</b> | <b>Sequence</b>                  |
|---------------------------|----------------------------|----------------------------------|
| 97s                       | HPV16                      | GTCGACCTGCAATGTTTCAGGACCC        |
| 880as                     | HPV16                      | GAAACCATAATCTACCATGGCTGATC       |
| X556A                     | HPV16                      | GCTCGAGCAGCTGGGTTTCTCTACGTGTT    |
| 773s                      | HPV16                      | GCACACACGTAGACATTCGTACTIONG      |
| E4as                      | HPV16                      | TGCTGCCTAATAGTTTCAGGAGAGG        |
| E43as                     | HPV16                      | GTGGTGTGGCAGGGGTTTCCGGTGTC       |
| E42as                     | HPV16                      | CGGTGCCAAGGCGACGGCTTTGG          |
| L1as                      | HPV16                      | GCAACATATTCATCCGTGCTTACAACC      |
| E2as                      | HPV16                      | CAGCCAGCGTTGGCACCACCT            |
| E2qas                     | HPV16                      | CAGCCAGCGTTGGCACCACCT            |
| 16S                       | HPV16                      | TATGTATGGTATAATAAACACGTGTGTATGTG |
| 16A                       | HPV16                      | GCAGTGCAGGTCAGGAAAACAGGGATTTGGC  |
| MALAT1s                   | MALAT1                     | CGTAGACCAGAACCAATTTAGAAG         |
| MALAT1as                  | MALAT1                     | CATATTGCCGACCTCACGGAT            |
| MALAT1asQ                 | MALAT1                     | AGCACCTGGGTCAGCTGTCAAT           |
| RPL0s                     | RPLP0                      | ACCTGGAAGTCCAACACTTCCTTA         |
| RPL0as                    | RPLP0                      | GATCTCAGTGAGGTCCTCCTTG           |
| gapdhf                    | GAPDH                      | ACCCAGAAGACTGTGGATGG             |
| gapdhr                    | GAPDH                      | TTCTAGACGGCAGGTCAGGT             |
| T7s                       | <i>In vitro</i> RNA        | ACGTTAAGGGATTTTGGTCATGAGA        |
| T7as                      | <i>In vitro</i> RNA        | TCAAATATGTATCCGCTCATGAGA         |

-----
